# Supplementary material
Source: publisher site journal article supplement (https://www.dovepress.com/article/322697)
Supplement: Supplementary file 1 [file get_supplementary_file.php]

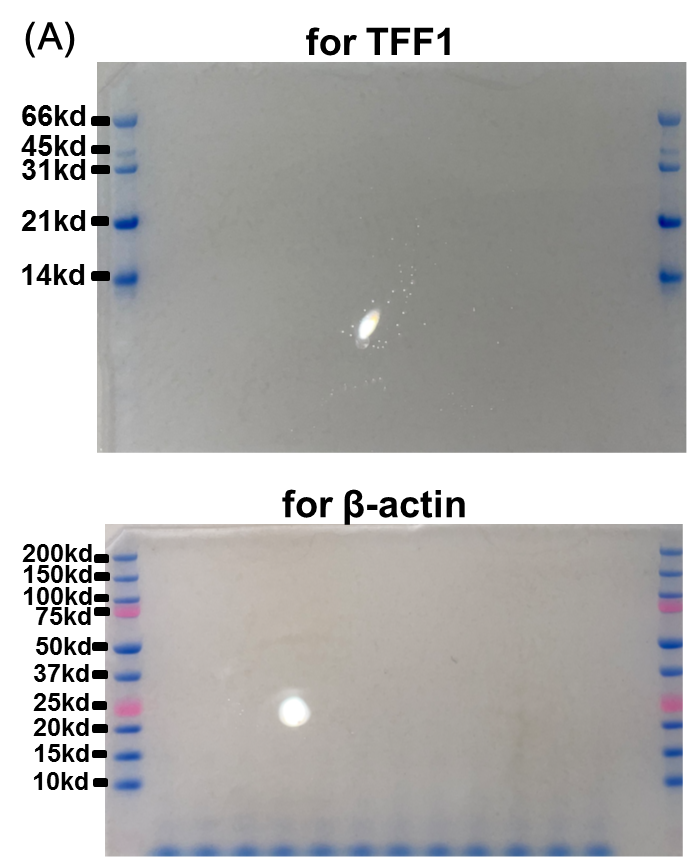


**Figure 1**


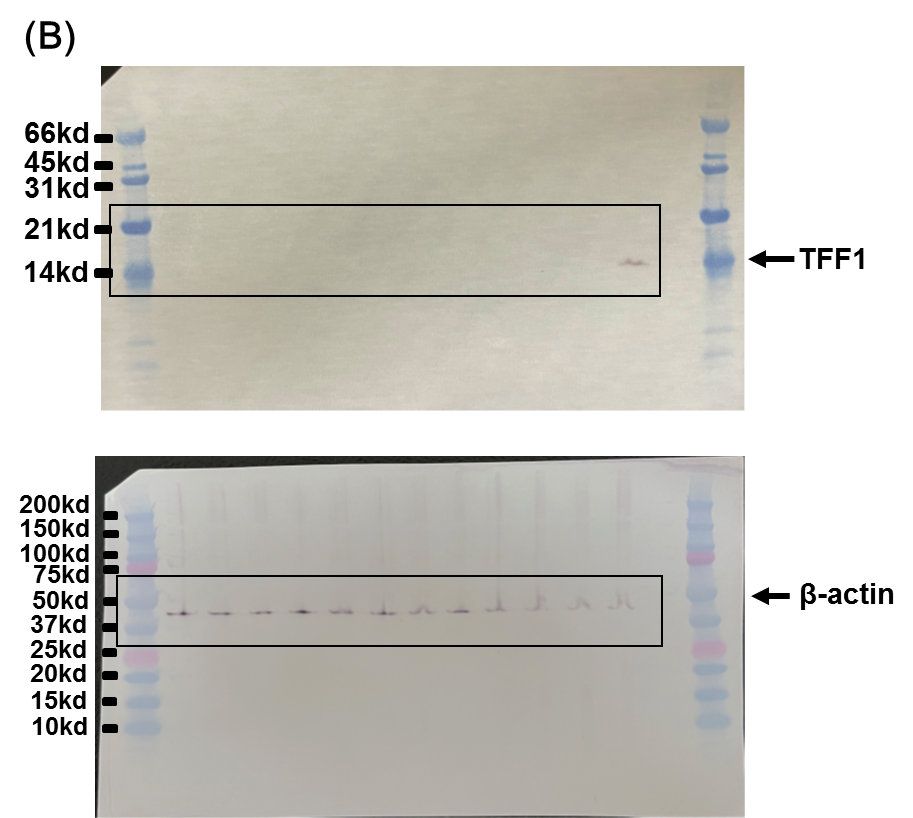


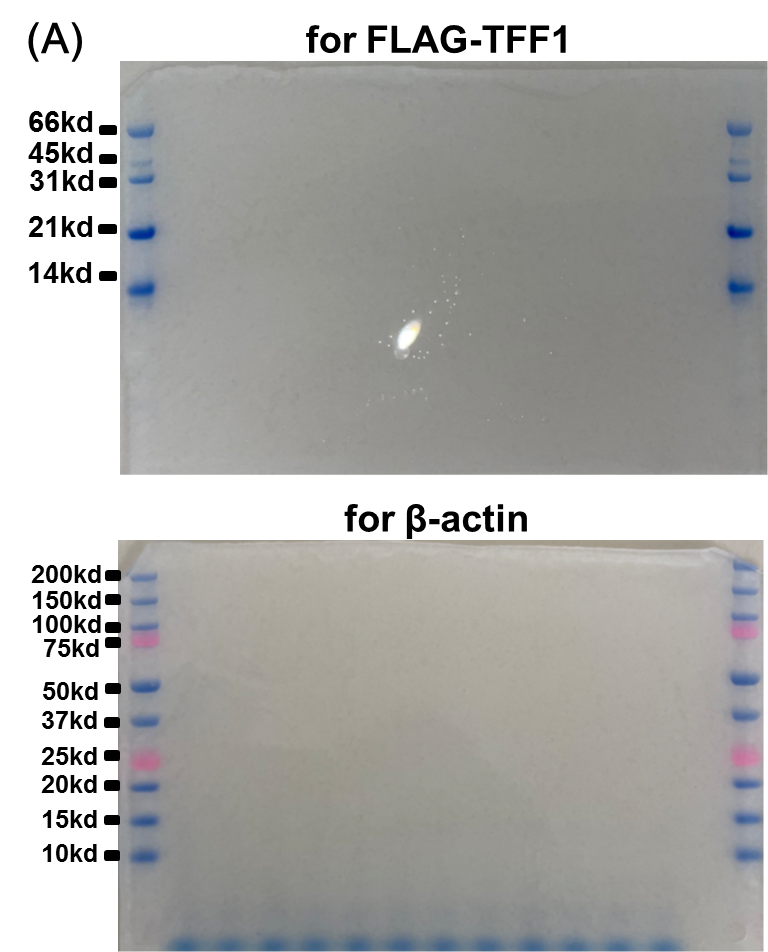


**Figure 2**


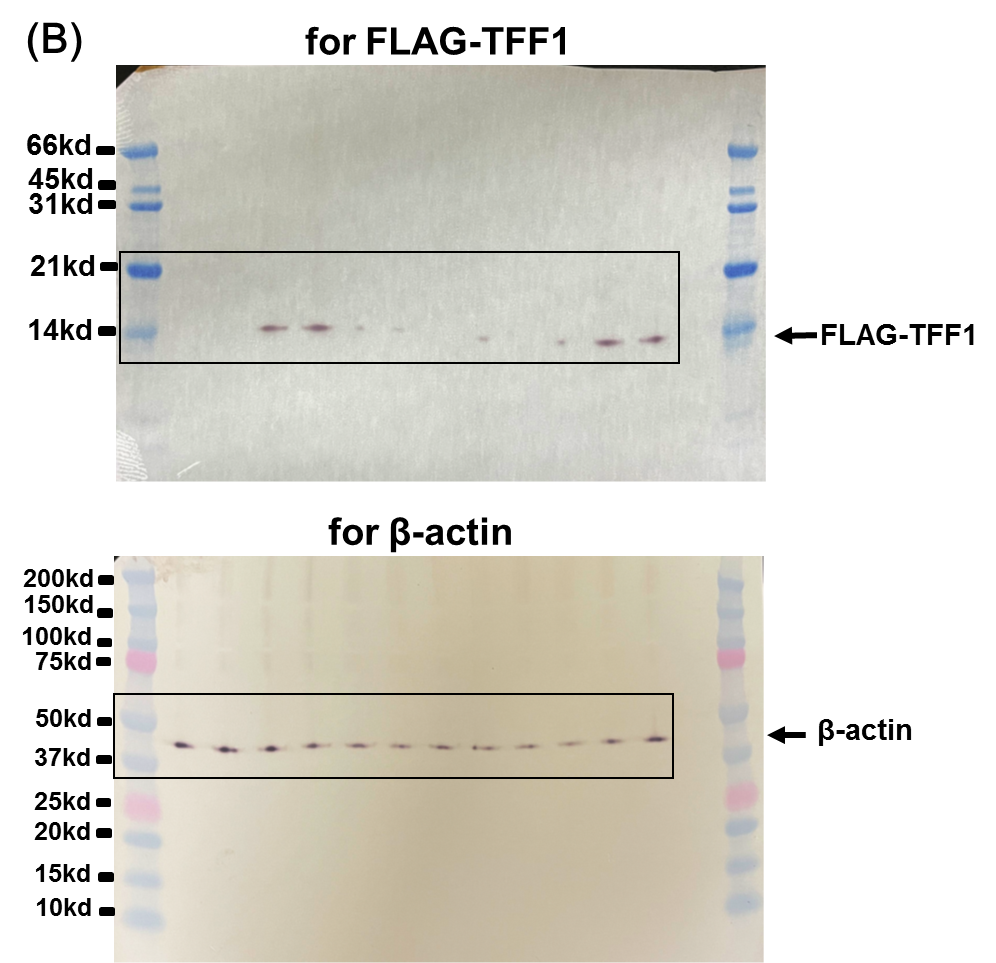


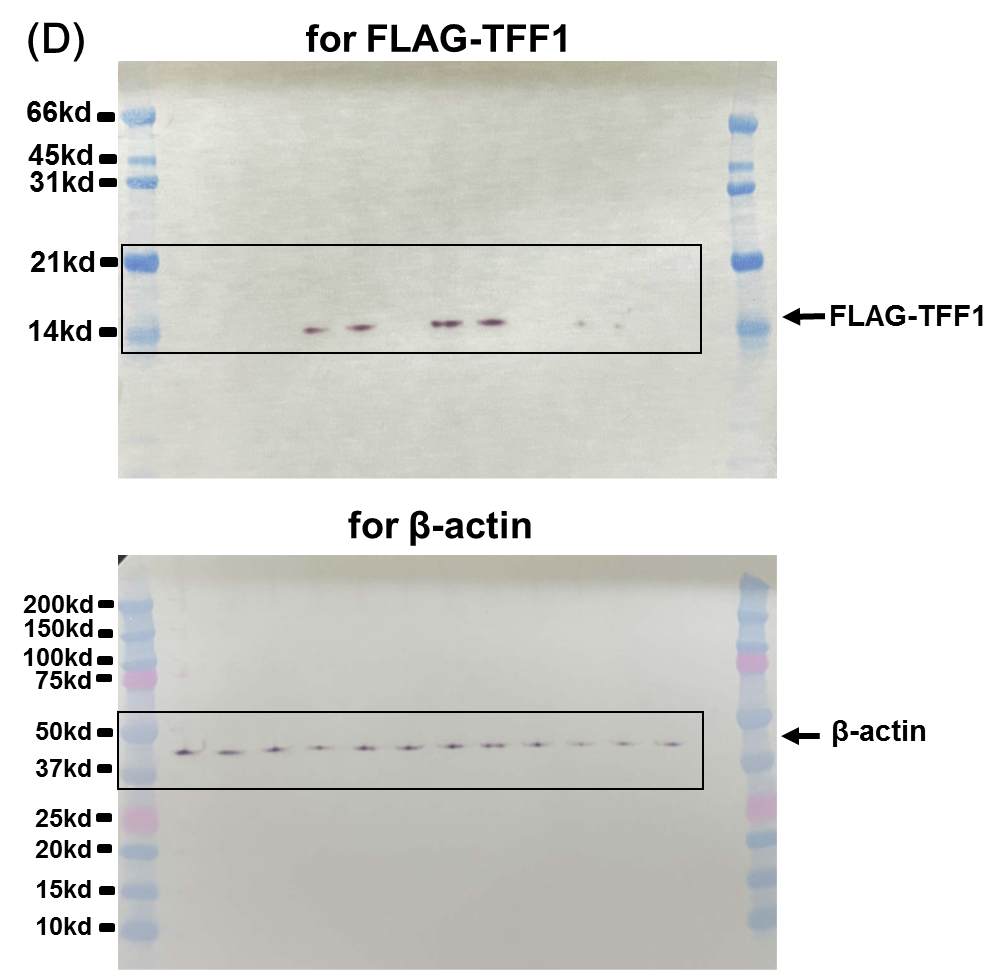

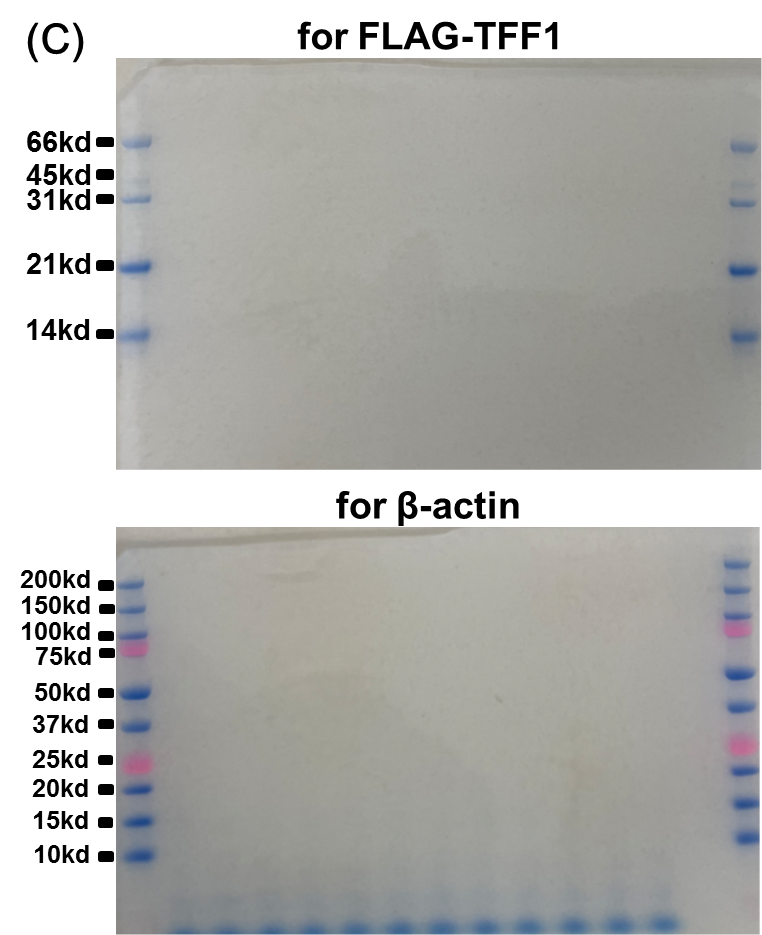


**Supplementary Figure 1.**  **Expression of endogenous TFF-1 and -actin protein in cultured cells from human lung carcinoma evaluated by immunoblotting. A. B.** Whole image of gels before transfer **(A)** and membranes blotted with anti-TFF-1 or anti--actin antibodies and colorized (**B**). Areas indicated by squares in **(B)** were cropped and inserted into the upper and lower parts, respectively, of Figure 1A. Positions of molecular weight markers (Prestained SDS-PAGE Standards, Low Range, 161-0305 [upper], and Precision Plus Protein™ Dual Color Standards, 161-0374 [lower], BioRad, Tokyo, Japan) were indicated on both edges.

**Supplementary Figure 2. Expression of introduced FLAG-TFF-1 and endogenous-actin proteins in cultured cells from human lung carcinoma evaluated by immunoblotting. A. C.** Whole image of gels of cell lysates from SBC-5 (**A**) and LC-AI (**C**) before transfer. **B. D.** Whole image of membranes for the cell lysates from SBC-5 (**B**) and LC-AI (**D**) blotted with anti-TTF-1 **(upper)** or anti--actin (**lower**) antibodies and colorized. Areas indicated by squares were cropped and inserted into the corresponding sites of Figure 2A. Positions of molecular weight markers (Prestained SDS-PAGE Standards, Low Range, 161-0305 [upper], and Precision Plus Protein™ Dual Color Standards, 161-0374 [lower], BioRad, Tokyo, Japan) were indicated on both edges.
